# Supplementary material for: How Important Is Income in Explaining Avoidance of Care Due to Cost-Sharing Payments? Results From a Mixed Methods Sequential Explanatory Study.
Source: Research Square preprint supplement (doi:10.21203/rs.3.rs-258936/v1), 2021-03-11
Supplement: Supplementary file 2 [file 1f4ed7e34b574abc1f475e77.docx]

# Additional file 3. Results of additional analyses

With respect to the stratified models, results were similar to those of the main model with one exception. Self-reported health was significant in the main model: moderate health (OR (95%CI): 1.57 (1.30-1.91)) and (very) good health (OR (95%CI): 1.49 (1.19-1.88)). This was not the case in the model for the prescribed medication (highlighted).

### Table 7. Results of logistic regression models and corresponding dominance analyses, stratified by type of healthcare service

| Healthcare service: |  | Prescribed medications | | | Ordered diagnostic tests | | Specialist care | |
| --- | --- | --- | --- | --- | --- | --- | --- | --- |
| Analysis: |  | Logistic regression model | Dominance analysis | Logistic regression model | | Dominance analysis | Logistic regression model | Dominance analysis |
|  |  | OR (95%CI) C | Determinant’s R2mf (% in overall) D | OR (95%CI) C | | Determinant’s R2mf (% in overall) D | OR (95%CI) C | Determinant’s R2mf (% in overall) D |
| *Variables* |  |  |  |  | |  |  |  |
| Intercept |  | 0.43 (0.27-0.68) |  | 0.48 (0.32-0.71) | |  | 0.63 (0.42-0.98) |  |
|  |  |  |  |  | |  |  |  |
| ***Set 1: Personal characteristics*** | |  |  |  | |  |  |  |
| Age (years) A | *Mean centered* | 0.96 (0.96-0.97) | 0.02 (14.1) | 0.96 (0.95-0.97) | | 0.03 (19.8) | 0.96 (0.96-0.97) | 0.02 (16.7) |
| Gender | Male (reference) |  | 0.00 (0.7) |  | | 0.00 (1.0) |  | 0.00 (1.3) |
|  | Female | 0.89 (0.72-1.10) |  | 0.92 (0.77-1.09) | |  | 0.97 (0.81-1.18) |  |
| Household situation | Living alone (reference) |  | 0.00 (2.0) |  | | 0.00 (3.0) |  | 0.00 (2.8) |
|  | Married or living together | 0.91 (0.73-1.13) |  | 1.01 (0.83-1.22) | |  | 0.97 (0.78-1.19) |  |
|  | Missing | 0.99 (0.44-1.83) |  | 1.10 (0.55-1.94) | |  | 1.29 (0.64-2.35) |  |
| ***Set 2: Health*** |  |  |  |  | |  |  |  |
| Self-reported health | (Very) poor (reference) |  | 0.01 (4.9) |  | | 0.01 (4.2) |  | 0.00 (2.7) |
|  | Moderate | 1.09 (0.85-1.41) |  | 1.85 (1.45-2.37) | |  | 1.58 (1.23-2.03) |  |
|  | (Very) good | 0.85 (0.60-1.20) |  | 1.58 (1.17-2.16) | |  | 1.48 (1.07-2.06) |  |
| Chronic conditions | None (reference) |  | 0.00 (1.5) |  | | 0.01 (4.7) |  | 0.01 (5.7) |
|  | One or more | 0.55 (0.40-0.79) |  | 0.51 (0.40-0.65) | |  | 0.44 (0.34-0.59) |  |
| ***Set 3: Skills*** |  |  |  |  | |  |  |  |
| Education level | Low (reference) |  | 0.00 (1.6) |  | | 0.00 (1.5) |  | 0.00 (1.7) |
|  | Moderate | 0.96 (0.74-1.23) |  | 0.99 (0.78-1.24) | |  | 0.93 (0.75-1.18) |  |
|  | High | 1.12 (0.85-1.51) |  | 1.16 (0.93-1.44) | |  | 1.17 (0.93-1.50) |  |
|  | Missing | 0.93 (0.52-1.57) |  | 1.09 (0.67-1.65) | |  | 1.22 (0.74-1.83) |  |
| Sense of mastery (Pearlin’s scale) B | *Mean centered* | 0.95 (0.93-0.97) | 0.02 (11.1) | 0.95 (0.94-0.97) | | 0.01 (8.5) | 0.95 (0.93-0.97) | 0.01 (8.2) |
| ***Set 4: Financial situation*** | |  |  |  | |  |  |  |
| Monthly net income | < €2000 (reference) |  | 0.04 (24.7) |  | | 0.03 (25.7) |  | 0.04 (26.7) |
|  | €2001-€3000 | 0.47 (0.34-0.62) |  | 0.44 (0.34-0.56) | |  | 0.45 (0.35-0.58) |  |
|  | €3001-€4000 | 0.31 (0.16-0.47) |  | 0.36 (0.23-0.50) | |  | 0.31 (0.19-0.46) |  |
|  | >€4000€ | 0.15 (0.03-0.35) |  | 0.33 (0.16-0.50) | |  | 0.27 (0.12-0.46) |  |
|  | Not-disclosed | 0.50 (0.36-0.66) |  | 0.53 (0.40-0.68) | |  | 0.52 (0.39-0.69) |  |
| Financial leeway | Incurring debts or using savings (reference) |  | 0.06 (39.4) |  | | 0.04 (31.6) |  | 0.05 (34.2) |
|  | Just enough to live on | 0.47 (0.38-0.58) |  | 0.56 (0.46-0.68) | |  | 0.56 (0.46-0.69) |  |
|  | Saving money | 0.19 (0.14-0.26) |  | 0.30 (0.23-0.38) | |  | 0.26 (0.20-0.34) |  |
|  | Not-disclosed | 0.35 (0.07-0.74) |  | 0.59 (0.27-1.10) | |  | 0.36 (0.11-0.70) |  |
|  |  |  |  |  | |  |  |  |
| N of observations | | 6012 |  | 4927 | |  | 4265 |  |
| Model fit | Overall R2mf | 0.15 |  | 0.13 | |  | 0.14 |  |
|  |  |  |  |  | |  |  |  |

*Dependent variable: ‘deductible-related avoidance of prescribed medication / ordered diagnostic tests / referred specialist care’. A = centered at the total sample’s mean age: 62.2 years (sd: 11.1). B = centered at the total sample’s mean score: 22.3 (standard deviation: 5.8). C = reflects bootstrapped confidence intervals. D = reflects the bootstrapped values.*

*OR = Odds ratio. R2mf = McFadden’s pseudo R2. 95%CI = 95% Confidence Intervals (lower bound-upper bound).*

With respect to the IPW models, our results resembled those of the main model except for self-reported health. The main model showed significant associations for self-reported health: moderate health (OR (95%CI): 1.57 (1.30-1.91)) and (very) good health (OR (95%CI): 1.49 (1.19-1.88)). Self-reported health was not significant in the IPW model (highlighted).

### Table 8. Results of IPW logistic regression model and corresponding dominance analysis

| Analysis: |  | Logistic regression model | Dominance analysis |
| --- | --- | --- | --- |
|  |  | OR (95%CI) C | Determinant’s R2mf (% in overall) D |
| *Variables* |  |  |  |
| Intercept |  | 0.55 (0.34-0.88) |  |
|  |  |  |  |
| ***Set 1: Personal characteristics*** | |  |  |
| Age (in years) A | *Mean centered* | 0.97 (0.96-0.98) | 0.02 (18.0) |
| Gender | Male *(reference)* |  | 0.00 (2.1) |
|  | Female | 1.05 (0.85-1.32) |  |
| Household situation | Living alone *(reference)* |  | 0.00 (2.4) |
|  | Married or living together | 0.88 (0.70-1.13) |  |
|  | Missing | 0.81 (0.39-1.60) |  |
| ***Set 2: Health*** |  |  |  |
| Self-reported health | (Very) poor *(reference)* |  | 0.00 (2.3) |
|  | Moderate | 1.26 (0.97-1.65) |  |
|  | (Very) good | 1.18 (0.82-1.67) |  |
| Chronic conditions | None *(reference)* |  | 0.00 (3.3) |
|  | One or more | 0.59 (0.42-0.82) |  |
| ***Set 3: Skills*** |  |  |  |
| Education level | Low *(reference)* |  | 0.00 (2.0) |
|  | Moderate | 0.97 (0.76-1.24) |  |
|  | High | 1.17 (0.88-1.52) |  |
|  | Missing | 1.29 (0.65-2.31) |  |
| Sense of mastery (Pearlin’s scale) B | *Mean centered* | 0.97 (0.95-0.99) | 0.01 (6.6) |
| ***Set 4: Financial situation*** | |  |  |
| Monthly net household income | < €2000 *(reference)* |  | 0.03 (25.4) |
|  | €2001-€3000 | 0.44 (0.33-0.58) |  |
|  | €3001-€4000 | 0.38 (0.22-0.60) |  |
|  | >€4000 | 0.30 (0.13-0.55) |  |
|  | Not-disclosed | 0.57 (0.41-0.76) |  |
| Financial leeway | Incurring debts or using savings *(reference)* |  | 0.04 (37.9) |
|  | Just enough to live on | 0.52 (0.41-0.65) |  |
|  | Saving money | 0.28 (0.20-0.37) |  |
|  | Not-disclosed | 0.42 (0.16-0.85) |  |
|  |  |  |  |
| N of observations |  | 7339 |  |
| Model fit | Overall R2mf | 0.11 |  |
|  |  |  |  |

*Dependent variable: ‘deductible-related avoidance of recommended healthcare’, i.e., avoidance of either prescribed medications, ordered diagnostic tests or specialist care due to the deductible. A = centered at the total sample’s mean age: 62.2 years (standard deviation: 11.1). B = centered at the total sample’s mean score: 22.3 (standard deviation: 5.8). C = reflects bootstrapped confidence intervals. D = reflects the bootstrapped values.*

*OR = Odds ratio. R2mf = McFadden’s pseudo R2. 95%CI = 95% Confidence Intervals (lower bound – upper bound). IPW = Inversed probability weighted.*
